# Supplementary material for: Natural Bred ε2-Phages Have an Improved Host Range and Virulence against Uropathogenic Escherichia coli over Their Ancestor Phages
Source: MDPI journal article supplement (doi:10.3390/antibiotics10111337), 2021-11-01
Supplement: s1 [file s1]

**Table S1.** Composition of the 79 *E. coli* strains originating from urinary tract infections used for initial HR determination of wastewater isolated phages

| <b>serotype</b> | <b>number</b> |
|-----------------|---------------|
| O25:H4          | 37            |
| O1:H25          | 1             |
| O100:H4         | 2             |
| O101:H9         | 1             |
| O15:H18         | 1             |
| O153:X          | 1             |
| O18:H1          | 1             |
| O18:H7          | 1             |
| O2:H6           | 3             |
| O20:H9          | 1             |
| O23:X           | 1             |
| O24:H4          | 1             |
| O25:H1          | 2             |
| O39:X           | 1             |
| O4:H5           | 1             |
| O6:H1           | 1             |
| O6:H18          | 2             |
| O6:X            | 2             |
| O73:H18         | 1             |
| O75:H7          | 1             |
| O8:H10          | 1             |
| O8:H7           | 1             |
| O9:H19          | 1             |
| O9:H25          | 1             |
| O9:H30          | 1             |
| O9:H4           | 1             |
| O9:H9           | 1             |
| X:H14           | 1             |
| X:H18           | 1             |
| X:H19           | 1             |
| X:H4            | 1             |
| X:H5            | 1             |
| X:H6            | 1             |
| unknown         | 4             |
