# Supplementary material for: Natural Bred ε2-Phages Have an Improved Host Range and Virulence against Uropathogenic Escherichia coli over Their Ancestor Phages
Source: MDPI journal article supplement (doi:10.3390/antibiotics10111337), 2021-11-01
Supplement: s1 [file s1]

**Table S2.** Overview of the 47 *E. coli* strains used for comparison of PHR and KHR and further characterization

| Strain                   | Phylogenetic group | Sequence type | Antibiotic resistance gene                                                             | antibiotic (co-) resistance           |
|--------------------------|--------------------|---------------|----------------------------------------------------------------------------------------|---------------------------------------|
| Af23 <sup>#</sup>        | A                  | 10            | <i>mcr-1</i> , <i>bla</i> <sub>TEM-1</sub>                                             | AMX, CIP, CS, SXT, TET                |
| K12 <sup>*#</sup>        |                    | 10            |                                                                                        |                                       |
| CHD28                    |                    | 90            | <i>bla</i> <sub>CTX-M-15</sub> , <i>bla</i> <sub>OXA-1</sub>                           | AMP, CTX, GEN                         |
| CHD1 <sup>#</sup>        |                    | 93            | <i>bla</i> <sub>TEM-1B</sub> , <i>bla</i> <sub>CTX-M-1</sub>                           | AMP, CTX                              |
| CDF8                     |                    | 167           | <i>mcr-1</i> , <i>bla</i> <sub>CTX-M</sub>                                             | AMP, AMX, CIP, CS, CTX, KAN, NAL      |
| Af49 <sup>#</sup>        |                    | 226           | <i>mcr-1</i> , <i>bla</i> <sub>CTX-M-55</sub> , <i>fosA3</i> , <i>tetR</i>             | AMX, CHL, CIP, CS, CTX, FOS, SXT, TET |
| CHD25 <sup>*</sup>       | ABD                | 453           | <i>bla</i> <sub>TEM-1B</sub>                                                           | AMP                                   |
| CHD15                    | AxB1               | 162           | <i>bla</i> <sub>TEM-1B</sub>                                                           | AMP                                   |
| CHD29 <sup>*</sup>       |                    | 399           |                                                                                        |                                       |
| S115 <sup>#</sup>        | B1                 | 23            | <i>mcr-1</i> , <i>bla</i> <sub>VIM-1</sub> , <i>bla</i> <sub>CMY-2</sub> , <i>floR</i> | CIP, CHL, CS, IPM, SXT, IPM,          |
| Af45 <sup>#</sup>        |                    | 101           | <i>mcr-1</i>                                                                           | CS, SXT, TET                          |
| CDF6 <sup>#</sup>        |                    | 446           | <i>mcr-1</i> , <i>bla</i> <sub>CTX-M-55</sub> , <i>fosA3</i> , <i>tetR</i>             | AMX, CIP, CS, CTX, SXT, TET           |
| CHD18 <sup>*</sup>       | B2                 | 12            |                                                                                        |                                       |
| ATCC 25922 <sup>*#</sup> |                    | 73            |                                                                                        |                                       |
| CHD3 <sup>*#</sup>       |                    | 73            |                                                                                        |                                       |
| CHD27 <sup>*#</sup>      |                    | 73            | <i>bla</i> <sub>TEM-1B</sub>                                                           | AMP                                   |
| 83972 <sup>*#</sup>      |                    | 73            |                                                                                        |                                       |
| UTI89 <sup>*#</sup>      |                    | 95            |                                                                                        |                                       |
| CHD10                    |                    | 126           |                                                                                        |                                       |
| CHD14 <sup>*</sup>       |                    | 127           |                                                                                        |                                       |
| CHD2 <sup>#</sup>        |                    | 131           | <i>bla</i> <sub>TEM-1B</sub>                                                           | AMP                                   |
| CHD5 <sup>*#</sup>       |                    | 131           |                                                                                        |                                       |
| CHD16 <sup>#</sup>       |                    | 131           | <i>bla</i> <sub>TEM-1B</sub> , <i>bla</i> <sub>CTX-M-15</sub>                          | AMP, CTX, GEN                         |
| CHD94 <sup>*#</sup>      |                    | 131           |                                                                                        |                                       |
| CDF2 <sup>*#</sup>       |                    | 131           | <i>mcr-1</i> , <i>bla</i> <sub>TEM-1</sub> , <i>bla</i> <sub>TEM-52</sub>              | AMX, CS, CTX, GEN, NAL, SXT TET       |
| H75 <sup>*#</sup>        |                    | 131           | <i>bla</i> <sub>CTX-M-15</sub>                                                         | AMP, CTX,                             |
| CHD13 <sup>*</sup>       |                    | 135           |                                                                                        |                                       |
| CHD6 <sup>*</sup>        |                    | 141           |                                                                                        |                                       |
| CHD8                     |                    | 5640          | <i>bla</i> <sub>TEM-1B</sub>                                                           | AMP                                   |
| CHD17 <sup>#</sup>       | D                  | 38            | <i>bla</i> <sub>CTX-M-15</sub> , <i>bla</i> <sub>OXA-1</sub>                           | AMP, CTX, GEN                         |
| CHD11 <sup>#</sup>       |                    | 69            |                                                                                        |                                       |
| CHD22 <sup>#</sup>       |                    | 69            |                                                                                        |                                       |
| CHD23 <sup>#</sup>       |                    | 69            |                                                                                        |                                       |
| CHD9                     |                    | 405           | <i>bla</i> <sub>TEM-1B</sub> , <i>bla</i> <sub>CTX-M-14</sub>                          | AMP, CTX                              |
| Af31 <sup>*#</sup>       |                    | 624           | <i>mcr-1</i> , <i>florR</i>                                                            | AMX, CHL, CIP, CS, SXT, TET           |
| Af48 <sup>#</sup>        |                    | 624           | <i>mcr-1</i> , <i>bla</i> <sub>CMY-2</sub>                                             | AMX, CEF, CIP, CS, KAN, SXT, TET      |
| CHD20                    | D/F                | 648           | <i>bla</i> <sub>CTX-M-15</sub>                                                         | AMP, CTX                              |
| CHD21                    | F                  | 117           |                                                                                        |                                       |
| Af24                     | unknown            | 1007          | <i>mcr-1</i> , <i>bla</i> <sub>TEM-1</sub>                                             | AMX, CHL, CIP, CS, SXT, TET           |
| CHD4 <sup>*</sup>        |                    | 1064          |                                                                                        |                                       |
| NRZ14408 <sup>*</sup>    |                    | 1851          | <i>mcr-1</i> , <i>bla</i> <sub>KPC</sub>                                               | CIP, CS, IMP                          |
| CHD7 <sup>*</sup>        |                    | 2020          | <i>bla</i> <sub>TEM-1B</sub>                                                           | AMP                                   |
| CDF1                     |                    | 3077          | <i>mcr-1</i> , <i>bla</i> <sub>TEM-1</sub>                                             | AMX, CIP, CS, GEN, SXT, TET           |

|         |  |           |                                                      |                    |
|---------|--|-----------|------------------------------------------------------|--------------------|
| IR3     |  | not known | <i>bla<sub>NDM-1</sub></i>                           | AMP, CIP, CTX, IMP |
| MI-4*   |  | not known | <i>nalR</i>                                          | NAL                |
| 1949820 |  | not known | <i>gyrA</i> S83N, <i>gyrA</i> D87N, <i>parC</i> S80I | CIP                |
| 523*    |  | not known | <i>nalR</i>                                          | NAL                |

# - strains used for breeding,\* - strains used for efficiency determination of bred phages compared to ancestors, AMP – Ampicillin, AMX – Amoxicillin, CIP – ciprofloxacin, CHL, Chloramphenicol, CS – Colistin, CTX – Cefotaxim, FOS – Fosfomycin, GEN – Gentamicin, IMP – Imipenem, KAN – Kanamycin, NAL – Nalidixin acid, SXT – Trimethoprim-sulphamethoxazole, TET - tetracycline
